# Supplementary material for: Improved quality of life and joint functions in patients with knee rheumatoid arthritis who underwent five portal arthroscopic synovectomy
Source: PeerJ. 2018 Apr 30;6:e4727. doi: 10.7717/peerj.4727 (PMC5933344; doi:10.7717/peerj.4727)
Supplement: Supplemental Information 1 [file peerj-06-4727-s001.xlsx]

## Sheet: Sheet1
sequence	age	sex	position	BeforeHAQ	BeforeDAS28	BeforeLysholm		After6wksHAQ	After6wksDAS28	After6wksLysholm		After3monthsHAQ	After3monthsDAS28	After3monthsLysholm		After1yrHAQ	After1yrDAS28	After1yrLysholm
RA Ⅰphase Aarm
patient1	38	F	L	1.58	3.92	33		1.34	3.25	69		0.97	2.31	79		1.4	2.42	86
patient2	41	F	L	1.66	4.14	28		1.43	2.43	73		1.78	2.23	77		0.93	2.63	81
patient3	46	F	L	1.8	4.91	43		1.67	2.21	78		1.64	2.45	87		1.25	2.31	83
patient4	53	M	R	2.49	3.33	48		0.94	2.92	83		1.53	2.92	75		1.52	2.25	88
patient5	33	F	L	1.47	4.61	46		1.56	3.16	70		0.9	2.34	84		1.22	1.92	79
patient6	37	M	L	2.42	4.58	46		1.59	2.62	60		1.56	2.65	88		0.77	2.14	75
RA Ⅰphase Barm
patient1	55	F	R	2.1	3.32	58		1.89	3.21	75		1.48	3.16	86		1.18	1.96	86
patient2	42	F	L	1.49	4.45	38		1.74	2.93	56		1.51	2.31	79		1.37	1.74	72
patient3	47	F	L	1.66	4.17	49		1.53	2.45	77		1.05	2.52	80		1.08	2.21	82
patient4	35	M	R	1.71	4.83	34		1.12	3.12	74		1.16	2.76	72		0.93	2.44	90
patient5	51	F	R	1.88	4.62	29		1.47	2.64	71		1.35	2.12	76		0.85	1.83	89
patient6	29	F	L	2.03	4.54	52		1.21	2.75	55		0.85	2.93	81		0.72	2.75	82
RA Ⅱphase Aarm
patient1	63	F	R	1.94	4.91	49		1.31	3.49	60		1.84	3.31	84		1.64	2.74	72
patient2	39	M	L	2.53	4.84	42		1.74	3.85	69		0.75	2.82	76		0.41	1.82	81
patient3	57	F	L	2.65	4.42	28		1.45	2.94	49		0.94	2.34	77		1.6	2.41	87
patient4	43	F	L	1.56	3.97	29		1.83	3.78	78		0.67	2.55	80		1.33	1.45	87
patient5	48	M	L	2.23	4.28	67		1.54	2.62	72		1.19	1.94	76		0.75	1.44	81
patient6	38	F	R	2.41	3.32	51		1.81	3.51	76		1.47	2.91	81		1.42	2.92	84
patient7	34	F	R	2.42	3.91	33		1.28	2.83	74		1.8	2.82	76		1.29	2.47	75
patient8	45	F	R	1.6	4.83	43		2.04	2.26	67		0.99	2.46	79		0.69	3.13	89
RA Ⅱphase Barm
patient1	38	M	L	1.89	4.63	70		1.75	2.66	63		1.72	2.32	66		1.64	2.51	74
patient2	48	F	L	1.21	3.71	36		1.43	2.41	70		1.74	2.84	73		2.03	1.93	89
patient3	33	F	L	2.49	3.93	64		1.87	2.76	75		1.34	2.35	73		1.53	2.35	77
patient4	52	F	R	2.64	4.34	24		1.12	3.17	61		0.89	3.53	88		0.85	2.42	78
patient5	51	F	L	1.55	4.76	62		1.21	3.68	79		1.63	3.12	84		0.71	1.84	81
patient6	58	M	R	2.34	4.75	34		1.69	3.23	72		1.57	2.11	70		0.52	1.95	74
patient7	44	M	L	1.72	3.88	34		1.79	2.85	74		1.13	2.96	81		0.74	2.59	86
patient8	53	F	R	1.47	3.25	33		1.49	2.92	71		1.05	2.82	84		1.79	2.15	76
RA Ⅲphase Aarm
patient1	50	F	L	2.36	4.92	30		1.38	3.24	40		1.68	2.43	55		0.58	2.64	69
patient2	46	M	L	2.2	4.71	57		2.09	3.45	70		2.07	3.64	70		1.66	2.58	73
patient3	59	F	R	2.3	3.83	29		1.43	3.02	76		1.76	3.41	73		1.72	2.92	75
patient4	68	F	R	2.41	4.76	18		2.15	3.7	64		1.14	2.55	73		1.65	2.13	78
RA Ⅲphase Barm
patient1	65	M	L	2.52	4.33	34		1.2	3.93	62		1.77	3.42	61		1.19	3.41	77
patient2	52	F	R	2.49	3.92	26		1.68	3.51	42		1.29	2.34	79		1.11	1.96	68
patient3	60	M	L	1.97	4.94	46		1.85	2.95	67		1.33	3.15	64		1.56	2.53	81
patient4	48	F	L	2.63	4.61	41		1.98	3.62	68		1.64	2.67	76		2.02	2.92	63
